# Supplementary material
Source: publisher site journal article supplement (https://www.spandidos-publications.com/2712/downloadSupplementary)
Supplement: Supplementary file 1 [file downloadSupplementary]

## Sheet: table S1
Table SI. Differentially expressed genes.
gene.name	SKBR3-124-REP1	SKBR3-124-REP2	SKBR3-124-REP3	SKBR3-control-REP1	SKBR3-control-REP2	SKBR3-control-REP3	fc	log2FC	pval
DHRS2	0.446277	3.03433	6.64351	30.6143	36.9906	29.2081	112.117	6.80887	0.0127854
S100A9	1.04226	5.91526	10.34	45.5649	43.3663	34.5617	106.482	6.73447	0.0149032
PHLDA2	18.2509	87.1814	83.031	56.4679	283.558	51.3127	102.29	6.67653	0.0196635
MIR24-2	0	6.46668	5.495	0	6.67742	0	84.4529	6.40008	0.0459569
POLE3	13.0322	65.7292	68.1378	71.0651	64.7569	13.0967	53.5417	5.74259	0.0386501
IL6	4.87162	12.772	9.45629	57.694	80.2649	69.6849	24.3328	4.60483	0.0145335
IFNL1	0	0	0	13.2019	15.7104	15.7283	15.9016	3.9911	0.000756003
KRT14	0.611239	0	0	38.1995	36.0156	34.2837	15.7291	3.97536	0.0059172
RAB2B	2.19755	9.09488	10.7388	10.709	13.7074	10.9888	15.203	3.92629	0.0309224
NECAP2	5.34787	10.4043	12.0898	20.311	23.7114	8.48989	12.7865	3.67655	0.0175321
PI3	5.53699	17.6526	16.8076	14.8598	29.2885	18.116	12.6835	3.66488	0.0272998
C11orf71	0	3.39937	3.83094	0.461094	1.30789	0.302021	11.6641	3.544	0.0321462
MFSD3	4.0013	13.3429	18.9616	11.5213	14.9372	11.1622	11.3699	3.50715	0.0346223
TNF	0	0	0	7.87265	8.59231	7.28545	10.2935	3.36367	0.000319268
KRT34	0.055936	0.0524996	0.233415	10.1006	8.01361	8.13493	10.0244	3.32544	0.00430108
INSIG1	13.0613	17.2979	20.1983	68.0701	62.4139	33.4237	9.5966	3.26252	0.0263422
ZFP36	10.259	5.8066	4.9133	162.878	175.692	172.269	8.98566	3.16762	0.0150162
HRASLS2	0.947796	2.02136	1.9569	7.30143	10.9572	9.42712	8.76433	3.13164	0.0126583
RP11-182L21.6	0	1.10469	1.70893	1.51227	2.19115	1.4592	8.13269	3.02373	0.0163495
INAFM1	4.84308	10.9618	13.9006	17.8387	20.9051	21.3438	7.81626	2.96648	0.048034
NFKBIA	121.952	145.419	163.508	701.545	730.503	689.647	7.72766	2.95003	0.000736545
RP11-122K13.12	0.124612	1.65305	0.959502	1.11783	2.59996	0.718067	7.67071	2.93936	0.0291407
RP11-21L23.2	0	1.95121	1.21019	0.858582	1.23492	0	7.64168	2.93389	0.0377112
NHP2	55.744	103.043	132.416	175.662	160.389	113.201	7.45373	2.89796	0.0172782
CD70	0.212941	0.389109	0.0963562	4.89714	5.87237	3.1173	7.20772	2.84954	0.0323206
MAFB	0	0.618512	0.718106	5.36837	3.76842	5.0792	7.13678	2.83527	0.0465802
TMED1	11.7148	17.8776	28.7444	45.895	36.7801	29.6513	7.07058	2.82183	0.0466446
NUAK2	1.75237	1.80984	2.60593	11.0009	13.8962	11.0517	7.03182	2.8139	0.00498363
NCF2	1.57427	0.455919	0.583284	28.3688	26.679	26.5793	6.98109	2.80345	0.0181419
PRPH	0	0.364287	1.03117	1.55932	2.98235	2.32958	6.7981	2.76513	0.042053
CCNA1	0.266569	1.55824	1.30152	3.75156	3.43824	2.94621	6.7255	2.74964	0.0237144
HIST1H3D	1.16658	4.18545	3.79855	5.05327	4.21057	2.49813	6.72444	2.74941	0.0411654
RP11-27M24.3	11.1155	21.763	22.5087	25.0168	26.5645	11.3829	6.71869	2.74818	0.030581
DNAJB1	34.47	40.5924	44.9285	137.202	130.809	74.0077	6.68437	2.74079	0.0347203
NEU1	12.8973	26.8788	26.9646	50.2368	46.2732	46.1667	6.52066	2.70502	0.0350167
GADD45A	14.3136	20.316	18.8154	62.0116	67.5759	52.8054	6.52051	2.70498	0.00101527
IL11	1.11239	0.514263	0.400988	16.1732	17.9654	16.6738	6.41496	2.68144	0.0113707
LOC100652758	0.212473	0.967173	1.08164	1.09559	2.77034	0.953836	6.37187	2.67172	0.0137057
TOMM7	70.5466	144.926	160.551	243.887	209.932	205.089	6.35368	2.66759	0.04534
LDLR	26.6492	26.1715	28.2819	164.824	167.71	166.042	6.33345	2.66299	0.000143872
AC104534.2	0.772674	3.35901	2.73376	2.53386	3.70348	2.20099	6.26516	2.64735	0.0210953
CGA	14.8417	23.8979	26.6625	46.4998	53.0749	40.6782	6.2537	2.64471	0.000971609
NR4A2	1.15717	1.17452	0.750988	14.4201	15.286	16.5407	6.14087	2.61844	0.00427445
CISH	0.455532	0.923069	0.74114	4.25153	5.6482	4.08065	6.05722	2.59865	0.00307474
HCST	0	0.375043	0.386192	1.69699	1.92613	0.446279	6.00173	2.58538	0.0374722
ZNF467	0.179049	1.2626	1.0321	3.11597	2.69172	2.11783	5.99895	2.58471	0.0243615
MRPS18A	8.49246	19.9709	21.9157	20.2299	20.9612	15.3312	5.98491	2.58133	0.0180828
RSAD2	0.199081	0.16152	0.360271	4.49616	5.74719	5.37375	5.948	2.57241	0.00618966
RARRES3	5.01609	9.57878	8.29432	21.1179	23.0566	23.7317	5.80409	2.53707	0.0279094
CEACAM1	0.86087	1.67798	1.72663	4.82081	5.8344	4.3246	5.76058	2.52621	0.000250928
AP000704.5	0	0.93195	0.968296	1.07888	1.48637	0.607807	5.69138	2.50878	0.00188794
MIR4435-1HG	1.56088	2.85712	3.02894	5.22789	6.4202	3.45692	5.66871	2.50302	0.0020745
RSRP1	7.26062	6.70649	7.32496	50.3057	41.6935	39.0267	5.64299	2.49646	0.00852273
IRF7	3.66502	7.89446	9.55262	9.91094	11.2246	9.5759	5.57158	2.47809	0.0234228
LIN7B	2.41477	3.81463	6.10046	5.61803	6.07017	2.81028	5.36804	2.4244	0.0295984
ZNF296	0.901464	1.4419	2.29905	7.15546	5.1126	5.3489	5.2686	2.39742	0.0498226
ADI1	2.81299	4.3318	6.23956	10.3643	9.90949	8.55827	5.25754	2.39439	0.0189686
SPCS1	30.8196	67.3068	69.5173	66.2732	75.6137	64.3136	5.19442	2.37696	0.0311819
IRF1	3.84849	6.32135	6.93776	15.4833	16.2384	17.156	5.18784	2.37513	0.0213695
DUSP6	3.53248	6.28974	8.3382	10.5834	10.2356	8.13703	5.18603	2.37463	0.0167883
ADAP1	0.982571	1.57242	2.31773	3.52057	4.91938	3.27562	5.10568	2.3521	0.0046595
CSF1	0.947056	2.62902	2.44536	5.25678	4.52764	4.35425	5.06548	2.3407	0.0374173
DDIT3	6.83628	14.6905	11.8921	17.2824	19.5452	13.9732	5.04002	2.33343	0.0196467
CXCL2	4.3493	3.04563	4.62365	19.9848	25.9953	22.2208	5.03873	2.33306	0.0368279
PPP2CA	25.0495	52.1807	51.0093	25.0836	51.2263	22.7625	5.03021	2.33062	0.0311277
RPP14	2.26516	6.56662	7.54104	4.35947	4.18972	2.23995	5.00868	2.32443	0.0310657
BAMBI	9.46104	13.8885	12.7648	37.7244	41.0324	42.7179	4.96539	2.31191	0.0133654
C10orf35	4.82301	8.17091	8.85476	12.2146	16.0761	12.5718	4.96443	2.31163	0.00547491
ALX4	0.532316	1.66513	2.42956	2.18621	2.40742	1.71374	4.92606	2.30043	0.0170417
CTC-453G23.8	0	0.622617	1.48903	0	0.905371	0	4.91958	2.29854	0.0418405
CHKB-AS1	0.719883	1.94583	3.18819	0.524485	1.59884	0	4.9037	2.29387	0.0191773
DBNDD1	0.354965	1.20366	1.34211	1.30283	1.93386	0.556994	4.8727	2.28472	0.00445092
SOX9	0.438852	0.431648	0.53724	4.88727	5.61557	5.27276	4.80335	2.26404	0.00111685
TUBB2A	12.739	19.578	20.6979	44.2587	43.8919	45.1421	4.79192	2.2606	0.0172459
LENG1	3.14557	4.7324	5.45442	13.5789	10.5898	9.15093	4.73102	2.24215	0.0299395
SECTM1	6.22884	13.1226	13.1361	17.6053	17.7974	17.8295	4.7179	2.23815	0.0489155
JMJD1C-AS1	0	0	0	2.59631	4.00859	3.7474	4.69215	2.23025	0.0241905
CSRNP1	9.53426	5.55851	6.63555	71.5393	65.9004	66.8555	4.68712	2.2287	0.0219152
LIF	2.85555	4.15004	4.577	10.5718	11.4784	10.2699	4.62388	2.2091	0.00206966
PLK3	3.77923	3.90692	3.56366	18.2274	20.5637	17.8984	4.62015	2.20794	0.00221468
DUSP5	8.36837	4.99295	4.16956	84.9585	72.6248	85.1223	4.5075	2.17233	0.0100953
HSPA5	181.833	227.159	231.987	700.243	670.046	692.254	4.50526	2.17161	0.00448245
ENC1	0.710699	2.63026	2.61653	1.61383	2.74597	1.9511	4.47838	2.16298	0.0440974
DYSF	0.0982225	1.19618	1.08473	1.61154	1.70919	1.61639	4.47469	2.16179	0.0487802
MSMO1	14.3489	15.5015	15.5672	60.244	62.2387	59.9086	4.47212	2.16096	1.33e-05
DBNDD2	1.16437	1.11157	1.95264	5.41344	6.41245	5.43609	4.42656	2.14618	0.0191485
RGS2	4.34014	5.3049	5.1603	25.3605	20.5987	24.3309	4.42638	2.14613	0.0134025
TSC22D3	2.58686	5.27399	5.91855	7.2663	6.92232	5.71192	4.39068	2.13444	0.0211314
RP11-525A16.4	0	0.545485	1.0595	0	0.926327	0	4.33668	2.11659	0.0417874
SOCS1	0.503736	1.22484	0.84753	3.58629	3.02583	1.85699	4.33315	2.11542	0.0491558
OAS2	0.557324	0.688677	0.787866	5.39866	4.13415	3.62622	4.21196	2.07449	0.0222885
IL1B	2.12502	3.04019	3.77729	8.21735	8.55293	8.80522	4.20176	2.07099	0.0167068
RNF135	1.56368	2.98511	2.79587	6.28587	6.18723	5.77905	4.19382	2.06826	0.0138847
TRIB1	5.5075	5.14077	5.06873	17.2492	25.4566	18.343	4.18626	2.06566	0.0370918
DTX3	5.75683	13.7427	13.6584	10.3632	10.875	8.0055	4.14681	2.052	0.0308944
ARMCX6	4.98772	9.14664	7.48769	11.7848	15.2061	11.9154	4.13167	2.04672	0.0214633
SLC25A25	7.57209	10.25	12.8665	22.8691	23.1549	23.3651	4.11454	2.04073	0.0211223
FAM46B	3.27297	1.93381	1.42711	28.9644	25.027	24.0363	4.08245	2.02944	0.0465072
SMIM3	0.613147	1.13729	1.62783	2.64112	3.04828	2.36539	4.0604	2.02162	0.00473081
FBXO27	0.120803	0.811952	0.60962	2.18462	1.81348	1.43387	4.05006	2.01794	0.029324
DNAJB6	9.69512	18.0396	21.3298	17.4437	21.3256	18.4436	4.02844	2.01022	0.0344966
ASNS	7.08246	14.9767	13.6748	15.2584	15.1709	11.9922	4.00153	2.00055	0.0316862
SQLE	7.25513	13.1898	13.4579	16.6511	17.6066	15.406	3.9561	1.98408	0.0182613
PARP10	3.73324	6.84406	6.84232	7.80855	9.34538	6.80373	3.92117	1.97128	0.0030502
SVIP	2.39265	4.05917	2.74045	7.67406	9.23681	6.99995	3.90311	1.96463	0.0344796
DLL4	0.238742	0.494622	0.242439	2.43223	2.61047	1.39966	3.88497	1.9579	0.0449724
DUSP8	3.43003	4.82587	5.77215	10.7997	11.2164	11.1422	3.88409	1.95758	0.0144435
ASB13	1.70635	4.64659	4.67328	2.35096	3.3421	1.7225	3.87989	1.95601	0.00577739
SMOX	8.11837	6.25813	7.9266	28.652	37.7068	34.7537	3.87776	1.95522	0.0383853
AC079922.3	0.109638	0.473828	0.784311	0.250741	1.11208	0	3.8651	1.95051	0.0429688
PPP1R15A	10.797	6.15443	5.99324	86.9729	81.6182	103.652	3.85845	1.94802	0.0060275
MANF	68.0124	111.175	114.693	175.454	162.313	161.067	3.84042	1.94126	0.034571
FUOM	4.68247	7.5885	7.88525	9.6229	11.0819	7.40381	3.82548	1.93564	0.000717351
OSR2	1.45527	2.44045	1.68136	7.19736	6.30565	5.40399	3.81639	1.93221	0.0365101
EHF	0.0725788	1.63406	1.65215	0.137065	0.572446	0.0798481	3.79985	1.92594	0.040363
EPGN	1.66373	2.85003	4.43405	1.63409	3.57065	1.48238	3.79476	1.92401	0.0389663
IL9R	0.420089	1.64019	1.34223	1.56418	1.89458	1.17628	3.78458	1.92013	0.01719
CXCL10	0.504858	0.471204	0.435972	6.24952	6.21674	8.89919	3.77808	1.91765	0.0220317
CFB	18.6189	18.0887	19.5553	71.5491	72.5583	74.6129	3.76729	1.91353	0.00064866
ZNF526	0.034848	0.072995	0.106725	2.42997	2.79221	2.77866	3.76054	1.91094	0.00174699
RTN4R	3.70065	5.83426	5.11743	9.16544	12.5366	10.7099	3.75445	1.9086	0.025492
ARMCX3-AS1	0	0.778705	0.753559	0.52053	0.664317	0	3.72364	1.89671	0.0137663
KLHDC4	3.91303	5.99169	8.06988	5.1774	7.38294	3.67959	3.71418	1.89304	0.0079937
CHST1	0.051246	0.121216	0.216828	1.17506	1.97237	1.02507	3.69121	1.88409	0.0193065
GTPBP1	7.51997	12.1374	11.5775	19.21	21.0503	20.5199	3.66102	1.87225	0.022927
HSD3B1	0	0.454245	0.371958	0.459043	1.05938	0.134231	3.65634	1.8704	0.0234004
CYP4F11	0.594921	1.68192	2.0225	1.05205	1.88206	0.972817	3.5982	1.84727	0.00671153
TGFB1I1	5.77206	6.5161	10.3102	11.0413	12.1648	7.86559	3.55103	1.82824	0.0459235
NR1D1	17.7369	11.7471	10.4682	93.3583	96.0565	90.567	3.5113	1.812	0.0402413
C11orf84	14.3694	21.5714	19.8778	31.6078	38.649	34.2957	3.5027	1.80847	0.0162173
CDKN2AIPNL	14.7694	25.4101	29.1401	27.1782	30.5575	28.6047	3.50208	1.80821	0.0431344
PLAUR	39.435	46.997	34.1259	127.724	144.94	130.721	3.48793	1.80237	0.0375838
CXCL11	0	0.471531	0.528045	0.712349	1.01389	0.423507	3.47529	1.79713	0.000172905
OSER1-AS1	0.481826	0.780528	1.64103	0.823037	1.49058	0.376689	3.4645	1.79265	0.0450386
LINC01057	0.279417	0.337532	0.713155	1.29711	2.19542	1.3296	3.41984	1.77393	0.0306975
IDI2-AS1	0	0	0.267541	2.45945	1.79843	1.95157	3.39534	1.76356	0.0384615
SOX17	3.18796	3.88412	3.94516	8.30978	10.2009	7.91862	3.38916	1.76093	0.00177764
CSAG3	0	0.166545	0.149227	1.23203	1.6055	0.96365	3.38766	1.76029	0.00358044
MALL	0.894265	1.86254	1.32423	4.05406	3.95578	3.80961	3.36155	1.74913	0.0337554
HIST1H3H	0	0	0	2.17874	2.40638	2.37425	3.3566	1.747	0.000563115
FDFT1	42.2116	56.5524	55.44	103.492	112.31	108.069	3.34377	1.74148	0.00765362
SYNPO	2.59242	5.80524	5.70716	3.9801	5.14148	3.69793	3.34282	1.74107	0.0202427
NUPR1	11.8885	16.3302	19.2161	30.341	29.7068	31.9638	3.32057	1.73143	0.0391154
RUSC1-AS1	0.36993	1.08028	0.921684	1.13661	1.40342	0.389486	3.31182	1.72762	0.0357049
RND1	0.122904	0.228404	0.247082	2.44105	2.58677	2.84788	3.302	1.72334	0.0046611
KLF6	1.0222	1.52124	1.22267	6.23791	5.50605	6.97944	3.25399	1.70221	0.03218
TMCC2	1.52375	2.22855	1.9775	5.46933	5.37634	4.64426	3.23474	1.69365	0.00525178
C10orf10	0.841722	0.370452	0.20588	7.42226	8.3628	9.64438	3.18679	1.6721	0.0222771
RGS9	0.188412	0	0	3.31901	3.55039	3.65225	3.18428	1.67097	0.00313859
IRX5	1.17621	1.34913	1.94128	3.37518	3.69384	2.53445	3.16867	1.66388	0.0145593
DUSP13	2.01604	3.89625	4.11298	4.94278	4.47191	3.99899	3.13307	1.64758	0.0395704
CITF22-92A6.1	0.188191	0.463126	0.404912	1.27929	1.61005	0.810288	3.12439	1.64357	0.0121123
ITGA2	7.48716	10.2765	11.4482	15.9493	19.0914	19.1754	3.09708	1.63091	0.0374791
MT2A	318.091	338.734	330.664	1048.08	1027.76	1175	3.09609	1.63045	0.00574765
RNF115	3.95794	5.57497	7.29614	5.8781	8.15819	5.83306	3.09172	1.62841	0.0152921
GPNMB	0.414553	1.61716	1.38927	1.35048	1.41771	1.03428	3.08329	1.62447	0.0416596
PHF13	5.96027	7.47856	7.05007	14.9876	17.7254	16.5431	3.07936	1.62263	0.00837388
SMIM10	2.23954	4.90495	5.22365	2.58866	3.47555	1.8379	3.07318	1.61973	0.00145603
CXCL3	0.899422	1.62984	1.8496	1.50597	2.52347	1.35543	3.06633	1.61651	0.00767258
TMEM52	0	0	0	1.34107	1.69214	1.086	3.04056	1.60434	0.0138694
TPGS1	9.41557	13.8166	15.0921	19.6912	18.0756	15.1573	3.02997	1.5993	0.0208084
SCO1	11.6976	17.428	18.0649	28.8702	24.4093	24.0509	3.02898	1.59883	0.0457432
HBEGF	2.14832	1.72025	1.52733	8.96373	10.6816	10.2893	3.01514	1.59222	0.0191828
SIRT4	0.795994	1.38541	1.4879	3.06236	2.52611	2.04086	2.99	1.58015	0.0295398
DNAJB5	3.55163	3.36354	3.53665	10.2052	11.2763	8.95616	2.96922	1.57009	0.0110475
ZC3HAV1	12.0768	12.6206	12.8453	47.4133	37.5798	44.8831	2.96435	1.56772	0.0214974
RNF40	18.8487	28.171	30.1216	33.0824	33.2405	26.5333	2.92433	1.54811	0.00874119
AC137932.5	0	0.391524	0.603353	0.871252	0.654937	0.347873	2.90367	1.53788	0.0406077
PPP2R5B	3.12121	3.60756	3.58151	7.01625	7.7919	5.22345	2.85075	1.51134	0.0221717
FAM122A	0	0	0	2.74996	2.31593	3.46118	2.84426	1.50805	0.0251566
PNPLA1	1.46487	2.4676	3.03868	2.13334	3.09805	1.97246	2.84194	1.50688	0.00501342
RPS19BP1	30.1476	41.3046	47.4229	58.0791	59.551	57.8373	2.8378	1.50477	0.0261814
TOR4A	5.27879	4.85513	5.67626	15.6584	15.936	15.2337	2.83664	1.50419	0.00468227
KIAA0930	17.5562	23.5147	24.9336	38.0862	37.3821	36.2423	2.82823	1.4999	0.0132409
PLEKHF2	1.34376	3.01199	2.641	1.90961	2.96056	1.93118	2.82648	1.49901	0.0337249
NAB2	8.3926	8.46734	8.52321	26.9082	25.969	27.7525	2.81543	1.49335	0.000466119
VSIG10L	0.882131	1.94716	2.43138	1.54938	1.95977	1.45414	2.8134	1.49232	0.0207569
GATA4	0.100477	0.14241	0.0525882	1.71837	1.80428	1.29355	2.80666	1.48886	0.0172312
ZC3H12A	5.86142	6.12691	6.44174	18.152	17.3177	18.4106	2.77869	1.4744	0.0020594
CTC-524C5.2	28.8886	40.0179	44.1055	34.8257	49.1016	32.7148	2.76988	1.46982	0.00944055
ZNFX1	9.29693	16.9891	17.0909	13.0905	13.7488	10.3975	2.75707	1.46313	0.0221829
SNPH	1.45821	2.13909	2.10496	3.66377	4.38409	3.8919	2.75544	1.46228	0.00667833
RP11-399K21.11	10.1036	12.5203	11.7041	21.7318	26.3364	25.509	2.71392	1.44038	0.0242968
PQBP1	29.6646	35.6289	45.3718	54.0092	50.6102	41.2015	2.69375	1.42961	0.0371939
AEN	12.0483	16.8068	18.6229	23.2761	23.5706	23.0428	2.68719	1.4261	0.0260578
RP5-1160K1.6	0.077333	0.646167	0.768501	0.607985	0.647848	0.325482	2.68111	1.42283	0.0121171
ARHGDIA	81.8628	112.342	112.986	169.941	166.905	170.483	2.67048	1.4171	0.0274511
BCAS4	1.7443	2.07918	2.19329	5.99021	6.21205	7.49084	2.66502	1.41415	0.0354544
CHCHD5	7.73521	13.7103	12.3134	12.8546	14.007	12.5823	2.66072	1.41181	0.0496087
SCAF1	12.3066	21.2058	24.7138	17.0456	17.5683	15.1039	2.65262	1.40742	0.0498578
MPV17L2	37.926	44.5104	50.7229	66.4599	72.1299	57.8601	2.64815	1.40499	0.00191102
TGFB2	1.60281	2.8862	2.9934	3.285	3.34664	2.81303	2.6381	1.3995	0.0167517
UBTD1	10.1351	12.7974	11.2901	21.5559	25.5516	24.0514	2.63578	1.39823	0.0224043
BCL7C	11.7064	15.8387	13.9715	20.4485	23.666	17.7467	2.63316	1.39679	0.0144358
CPEB2	0.66263	1.83126	1.56592	1.4604	1.73857	1.38831	2.61958	1.38934	0.0456733
SPRY4	2.21495	2.20516	2.25719	7.86697	7.63302	8.29113	2.60404	1.38075	0.000832859
IL27RA	5.37516	8.84051	9.48171	7.93062	9.7267	8.81256	2.59716	1.37693	0.0496661
GBP2	0.097996	0.273184	0.458789	0.494117	1.02071	0.460025	2.59665	1.37665	0.021092
PSMB9	3.3745	4.46974	4.39155	5.46603	8.03228	6.30381	2.58779	1.37172	0.0407502
HOXB-AS4	0.777561	1.86035	1.84254	0.746155	1.43376	0.490406	2.58687	1.37121	0.0103581
ANKRD39	4.50746	5.37952	6.04134	7.71187	9.42351	7.13812	2.5666	1.35986	0.00289611
CCDC9	4.56508	4.41725	5.77727	11.7207	10.8135	10.2089	2.55827	1.35517	0.0315464
ARID3B	2.35393	2.33837	1.64059	9.04631	8.62073	8.12972	2.54545	1.34792	0.0422208
NKX3-1	1.88627	3.17603	3.41234	3.24364	3.4463	2.53686	2.54345	1.34678	0.00531079
TOB1-AS1	0.170294	0.893683	0.639756	0.52865	0.752316	0.211277	2.53662	1.34291	0.03248
ZNF787	19.0392	22.1053	21.1439	43.4167	42.3781	38.9253	2.53618	1.34266	0.00313107
TUBB3	3.8004	5.07627	5.5713	9.45011	8.46892	9.1437	2.53396	1.34139	0.0404666
BMP4	0.197101	0.498812	0.815971	0.814661	0.920174	0.546103	2.53022	1.33926	0.00964604
GDF1	4.64676	7.03937	7.60024	6.53329	8.27826	6.56156	2.5293	1.33874	0.00958834
DNPH1	22.7997	31.7573	27.7022	44.6925	43.8285	37.8345	2.52341	1.33538	0.0254678
PMAIP1	6.7021	5.44526	5.87209	21.8352	21.0996	21.9368	2.5217	1.3344	0.00406231
BCL6	7.20671	6.06115	6.14151	23.1367	23.9701	26.0832	2.51848	1.33255	0.00314825
FAM3A	19.8236	31.0837	25.4558	32.7672	35.0608	27.963	2.51839	1.3325	0.0437715
PIM2	8.44493	9.00642	10.3346	15.5905	18.6013	15.6853	2.51206	1.32887	0.00821571
TTC32	1.82009	2.67484	2.8375	3.24723	3.33315	2.06111	2.49273	1.31773	0.0230847
IGFBP6	66.6154	48.3968	45.3652	240.784	223.509	218.696	2.48834	1.31519	0.0471345
DEDD2	7.36836	7.23804	5.17088	25.7253	25.3052	26.3965	2.48525	1.31339	0.0480032
IFNL2	0	0	0	1.90128	1.50068	1.71587	2.48003	1.31035	0.00818496
TMEM208	20.5632	26.2747	30.1438	29.7455	33.0278	24.7507	2.47555	1.30775	0.00206753
RNF149	7.62681	10.4903	11.8133	9.55401	11.5331	7.47858	2.4705	1.3048	0.00267179
TP53TG1	3.17166	4.4951	4.80894	3.92495	5.53636	3.42353	2.45829	1.29766	0.00899618
DHX58	2.07834	2.43017	2.25114	8.23731	6.77144	8.68774	2.4507	1.29319	0.0396205
AKAP17A	5.81229	6.86416	7.01592	14.8009	13.7366	14.7948	2.43451	1.28363	0.0139245
LRFN3	2.50312	4.16187	4.08122	2.54671	4.29551	2.53463	2.43053	1.28127	0.0416307
STK35	3.70108	4.2435	4.65264	7.55337	8.0948	6.83837	2.42659	1.27893	0.000435579
RNF122	1.62492	1.48327	1.6736	6.04054	5.15183	5.24194	2.42136	1.27582	0.014157
LCN15	0	0.122682	0.497632	0.277959	0.612737	0.235134	2.41516	1.27212	0.0440507
TMUB2	9.01727	12.1623	12.6748	18.5672	18.116	19.4206	2.41467	1.27182	0.0433121
ZNF775	0.674024	0.838326	0.591141	2.25046	2.74148	2.03521	2.41151	1.26993	0.0335157
RP11-332H18.5	1.16005	1.57879	1.54799	3.04764	3.18204	2.71226	2.40507	1.26608	0.00078377
ATRIP	5.27694	6.92459	8.61165	6.86175	8.15368	5.67727	2.40097	1.26362	0.00649874
RP6-99M1.2	0.493707	1.067	1.52499	0.6811	0.900933	0.311226	2.39029	1.25718	0.0088031
ACSS2	6.87054	6.987	8.09071	16.7811	15.4435	15.3141	2.38201	1.25218	0.0132069
C1orf123	5.15205	7.10848	8.00282	9.33973	8.51089	7.33116	2.37535	1.24814	0.0318621
ZBTB43	4.20858	4.96876	5.40763	6.16937	8.43305	6.11068	2.3719	1.24605	0.0206884
SRA1	9.19192	12.2579	10.9986	22.195	19.6303	21.1497	2.36597	1.24243	0.0469872
APOL1	5.17619	5.39892	6.07113	12.6322	12.307	12.6477	2.36156	1.23974	0.00618282
ZNF799	0.789656	1.19276	1.25339	1.49126	1.87522	1.02103	2.35815	1.23766	0.010991
AKAP17A	5.9147	7.05973	7.172	15.4783	13.903	16.0742	2.35728	1.23712	0.0335841
DDX39A	16.273	23.605	24.5014	26.7578	28.1727	28.039	2.3476	1.23118	0.0480438
AC073842.19	16.4553	17.4495	20.2981	27.9024	31.1343	25.5169	2.34075	1.22697	0.00772336
ADGRE1	0.0626615	0.0588117	0.126163	1.25847	1.24343	1.04111	2.3379	1.22522	0.00367831
UBXN6	34.7175	38.0099	41.734	63.3361	66.6931	59.1439	2.32059	1.21449	0.00103542
CMTM7	2.55782	3.51816	4.02767	4.14328	4.1089	2.82983	2.30816	1.20674	0.0235088
CLPTM1L	84.4423	142.148	140.891	80.8402	107.862	76.0768	2.30185	1.20279	0.0191013
GSR	25.8013	37.6371	39.2926	38.7423	40.4501	37.1664	2.29937	1.20124	0.0269062
RP11-253A20.1	0	0.279514	0.433234	0.194654	0.426766	0	2.29116	1.19608	0.00299904
MSTO1	4.54278	7.49288	7.58712	6.06817	5.8918	3.93788	2.29082	1.19586	0.0465865
BCAP31	58.7022	74.0163	86.6385	95.0855	95.806	90.7059	2.28775	1.19393	0.0278375
NYAP1	0.616036	0.462779	0.311112	2.63149	3.26484	2.82508	2.28682	1.19334	0.0489732
SNAI3	0.118664	0.291212	0.353222	1.33305	1.13197	1.16841	2.27482	1.18575	0.0162428
LRRC47	9.4076	12.2215	12.6341	15.7557	17.8009	17.0519	2.26638	1.18039	0.0205502
KCTD7	0.526275	1.11262	1.10486	0.674312	0.993968	0.222933	2.26348	1.17854	0.0346974
TNNT1	17.4949	18.8204	19.582	34.0247	32.3572	26.4925	2.26268	1.17803	0.02762
HAGHL	5.19453	5.55694	6.22805	9.56328	10.058	8.1028	2.24521	1.16685	0.00814947
PHF7	0.18386	0.450531	0.721254	0.699452	0.847069	0.614002	2.23966	1.16328	0.013545
ALOX5	3.79346	3.72465	3.53131	7.80854	9.02722	6.96033	2.23769	1.16201	0.0375075
INPP5E	4.56574	7.44727	7.19768	5.47539	7.07798	5.43947	2.23472	1.1601	0.0228916
MATN3	0.158448	0.415028	0.361737	0.398972	0.880055	0.262207	2.23352	1.15932	0.0496244
CORO2B	0	0.047731	0.106108	0.477437	0.726716	0.225867	2.22197	1.15184	0.0426092
WWOX	1.88349	3.96207	3.35142	1.65243	2.42163	1.13036	2.21153	1.14504	0.0497808
MXD1	1.61913	1.43812	1.16437	6.4955	5.69362	6.06306	2.20675	1.14192	0.0129376
SPRYD3	9.66828	11.6715	10.9807	22.6949	19.0713	19.2671	2.20553	1.14112	0.0439536
SOD2	28.208	30.7367	30.4201	72.8542	59.5172	66.6623	2.19051	1.13127	0.040636
NLRP1	1.42538	1.6224	1.89889	2.71699	3.0887	2.2332	2.18885	1.13018	0.00859082
ADM2	2.01748	3.56922	3.82159	3.09634	2.92737	2.37322	2.18641	1.12856	0.0465533
RP11-379H18.1	0.534652	1.35501	2.06739	0.243323	0.539942	0	2.18575	1.12813	0.0163368
UBE2S	189.094	182.426	168.816	416.432	446.556	426.414	2.18076	1.12483	0.00914547
MGAT1	12.4544	16.2115	17.1074	18.548	20.9381	18.6762	2.18032	1.12454	0.007659
TGIF1	17.9735	23.945	22.5485	28.2032	31.3051	28.0838	2.16906	1.11707	0.0123743
WDR25	4.37046	5.35976	5.67178	8.36131	8.0572	7.28626	2.16855	1.11673	0.00681188
NOC4L	19.5177	24.6765	23.2812	32.851	34.7802	31.3214	2.15285	1.10625	0.00569508
RP11-38G5.4	6.16216	7.65723	10.0236	7.24554	9.1082	7.04729	2.15153	1.10536	0.0360785
CCDC150	0.251493	0.727377	0.769483	0.208346	0.614225	0.024479	2.1474	1.10259	0.020061
CCL27	0.357114	0.820923	0.736016	1.19265	1.04177	0.743055	2.14151	1.09863	0.0399316
ZNF550	1.35141	1.84767	2.36085	1.41016	2.25798	1.24163	2.1409	1.09822	0.0319724
RHOC	54.7683	61.6188	60.6872	109.589	110.509	114.547	2.14019	1.09774	0.00677801
SCAF4	3.53076	4.39886	5.09316	5.80631	6.72686	6.45409	2.13645	1.09522	0.0343038
CD320	63.6023	71.733	73.2145	126.261	117.908	116.747	2.1315	1.09187	0.00833843
KIF27	0.321293	0.892384	1.05179	0.835806	0.723004	0.486489	2.13105	1.09157	0.0483487
TMSB4X	1675.25	2151.21	2219.92	2797	2669.39	2552.12	2.12525	1.08763	0.0225972
MATN1-AS1	0.152053	0.426227	0.525049	0.446254	0.685977	0.276119	2.11859	1.08311	0.00107617
SLC15A3	0.481932	0.574932	0.489222	2.53091	1.95764	2.02061	2.10986	1.07715	0.0387778
CDCA5	26.8797	32.0818	32.5275	51.1164	48.5105	48.9494	2.10936	1.07681	0.0143633
ABHD11	3.81009	6.06626	5.43101	5.17067	5.4613	3.83844	2.1086	1.07629	0.0380883
CCDC86	31.7995	38.9223	40.7458	50.1933	56.5799	55.837	2.10104	1.0711	0.0312054
DGCR14	3.04363	4.50556	3.75586	4.72437	5.60106	4.56855	2.07809	1.05526	0.0392964
IL15	1.23904	1.92761	2.0318	2.31975	2.46088	2.24257	2.07273	1.05153	0.015945
METTL1	6.39669	10.3691	10.5754	5.80283	8.18463	5.67933	2.07036	1.04988	0.026626
MED10	29.3138	37.136	33.0537	45.3333	48.5174	39.5325	2.06774	1.04805	0.0233568
ARL2	40.151	45.1892	53.3489	68.0642	65.0068	62.9681	2.05851	1.0416	0.0332657
DECR2	12.1934	17.8327	18.877	14.8247	15.6593	12.2436	2.05607	1.03989	0.00854284
BCL2L11	3.73161	5.67978	5.65871	5.25505	6.0847	5.58766	2.05292	1.03768	0.043999
TFAP4	7.38393	8.78937	8.55858	11.5005	12.471	9.78042	2.04817	1.03434	0.00862904
C6orf1	4.72952	5.18022	4.43795	11.5542	11.1942	11.9959	2.01897	1.01362	0.015547
GJC2	0.299089	0.755064	0.885249	0.215689	0.681745	0.190057	2.01609	1.01156	0.0297098
RP1-302G2.5	0	0.224051	0.377326	0	0.38614	0	2.01433	1.0103	0.0467775
FZD5	1.84871	2.64269	2.37277	2.64361	3.14225	2.0521	2.01104	1.00794	0.0285744
SLCO4A1	24.7662	32.2419	31.8278	41.6622	40.5852	41.2354	2.00512	1.00369	0.0378023
NF1	9.25989	10.364	10.504	3.62274	3.64478	3.64799	0.499346	-1.00189	0.00289869
XPR1	10.0837	9.72727	9.55055	5.34451	4.83727	5.19593	0.499003	-1.00288	0.00184496
TBC1D15	6.78476	5.023	5.73132	3.52937	3.54309	3.56566	0.498854	-1.00331	0.0391324
RP11-22P6.3	12.642	7.33013	6.0821	15.49	12.7452	18.0138	0.496846	-1.00913	0.0177251
NCBP2	24.096	17.0649	17.5535	15.7367	15.7801	16.3477	0.496403	-1.01042	0.0446895
LRRC16A	12.0434	10.6476	10.4189	5.65223	6.76935	7.04075	0.495693	-1.01248	0.0475655
TAOK3	9.93238	8.30733	8.60721	5.2292	5.38458	5.73893	0.495582	-1.0128	0.00654914
TMX3	4.56038	5.34808	5.43229	1.35115	1.35593	1.24959	0.495572	-1.01283	0.00181923
ASCC3	6.25424	6.56491	6.39821	2.53316	2.61759	2.74455	0.495151	-1.01406	0.00248662
CNN3	3.20175	2.73615	2.82743	1.65313	1.57919	2.19234	0.494184	-1.01688	0.0193578
AK4	11.6029	10.4168	10.0233	7.7942	6.46874	7.99231	0.49367	-1.01838	0.00735385
SNX4	13.2147	14.6003	15.2892	6.06677	5.71325	6.671	0.492982	-1.02039	0.037012
AP4M1	3.5742	2.48769	2.56426	3.09676	2.15356	3.2479	0.490628	-1.0273	0.0232589
RP11-626P14.2	0.613269	0.223661	0.246944	0	0	0	0.490376	-1.02804	0.0361616
USP6NL	3.33337	2.77165	3.14718	1.00927	1.32636	1.28447	0.490111	-1.02882	0.0440109
PMS1	2.00527	1.56634	1.76135	0.573415	0.659347	0.698428	0.488913	-1.03235	0.0143419
SCARF2	1.73375	1.35069	1.35267	0.811996	0.806416	1.34794	0.488601	-1.03327	0.0366745
FBXO34	13.0851	11.0893	12.4477	6.74201	7.20301	8.53173	0.487948	-1.0352	0.0460301
CSE1L	97.0492	92.3628	75.6141	55.5967	56.4936	56.4401	0.487572	-1.03631	0.0423862
ZNF28	2.12376	1.95675	2.10826	0.753471	0.627788	0.828488	0.487372	-1.0369	0.00582722
PIGN	4.63377	3.74289	3.91574	2.70664	2.55273	3.43607	0.486685	-1.03894	0.013924
ZNF200	4.78882	4.88692	5.37286	1.57038	1.85894	2.11336	0.485594	-1.04218	0.0486374
ATP13A3	15.2855	14.19	12.9695	9.09089	8.50853	9.8628	0.483914	-1.04718	0.00175195
ERO1B	3.80036	2.5697	2.61894	2.14553	2.36593	2.91506	0.482896	-1.05022	0.0380292
ATG2B	5.73469	4.9135	4.85181	2.8056	2.698	2.78635	0.482098	-1.0526	0.00263437
GSTK1	73.0007	52.1656	53.1358	68.1257	50.315	66.2115	0.480427	-1.05761	0.0378082
NRBF2	21.7876	20.1044	18.4982	14.2731	12.7309	15.9511	0.480405	-1.05768	0.00594043
SLC39A8	51.3482	52.6155	51.0064	28.176	26.0047	30.3831	0.479631	-1.06	0.0116311
INTS5	7.33117	7.44546	8.00028	3.08798	3.01766	3.46225	0.479355	-1.06083	0.0144844
RAP2A	4.95108	4.55418	3.95291	2.85678	2.21841	2.39797	0.479023	-1.06183	0.0387845
ZYG11B	3.81889	2.91559	2.57384	2.17497	2.06154	2.28706	0.478486	-1.06345	0.0109661
ZNF395	4.61153	3.47639	3.64329	2.45781	2.57536	3.17598	0.478339	-1.0639	0.0191228
CDYL	30.5286	22.6553	23.811	18.5567	18.7829	20.2017	0.478006	-1.0649	0.0219702
KIAA1143	6.72062	6.65643	6.26072	2.93518	2.7769	2.72901	0.477793	-1.06554	0.0030272
PSIP1	8.42765	6.96895	6.66265	4.10236	4.09279	3.68333	0.47762	-1.06607	0.038728
RP11-441O15.3	0.531605	0.275931	0	0.162048	0.112559	0.301886	0.477506	-1.06641	0.0419566
RP11-464F9.20	0.514807	0.239978	0.266738	0	0	0.284607	0.476903	-1.06823	0.0282869
GPR173	2.4074	1.85752	1.50284	1.89515	1.43372	2.36749	0.476266	-1.07016	0.00936787
TP53INP1	1.35558	1.41478	1.23537	0.182333	0.170476	0.199895	0.475497	-1.07249	0.00224985
STRA6	6.61968	4.82357	4.75237	4.85174	4.43049	6.18055	0.474932	-1.07421	0.00588221
TMEM123	37.8006	35.8836	38.477	15.9751	17.8477	17.6342	0.474919	-1.07425	0.0128054
SLC22A5	14.6554	11.732	14.3147	7.53006	7.37158	8.29657	0.474741	-1.07479	0.0420298
TRUB1	11.5984	10.9336	9.48745	5.14442	5.84948	5.49146	0.474567	-1.07532	0.0346132
RBL1	3.54208	3.26668	3.24964	0.887922	1.28129	1.09201	0.472975	-1.08016	0.0378593
PKP4	10.3439	10.8752	9.75329	3.94847	4.5774	4.37254	0.472596	-1.08132	0.0192757
ABLIM1	10.8948	10.472	10.1728	4.79244	5.00855	5.06482	0.472103	-1.08283	0.0011156
CHM	3.26719	3.72933	3.61536	0.680627	0.894997	0.830838	0.472093	-1.08286	0.0108648
ARHGAP21	10.3947	11.5779	10.5676	3.91296	4.24093	4.12548	0.47179	-1.08378	0.00753792
JRKL	2.11228	2.07848	1.88812	0.504688	0.582038	0.596397	0.471716	-1.08401	0.003746
HOXD-AS2	2.49697	1.32685	1.18419	2.15749	1.59455	2.05363	0.471318	-1.08523	0.0402119
TTI1	13.0207	13.1544	12.5007	5.88862	5.93925	6.18887	0.471235	-1.08548	0.000912794
FGF2	8.50745	6.02477	6.90153	4.76085	4.82689	5.522	0.470048	-1.08912	0.0328643
GNAZ	3.04232	3.26257	2.78402	1.13693	1.21595	1.62456	0.469787	-1.08992	0.04455
NCAPG	9.58762	9.21269	7.99207	4.68407	4.50232	4.42285	0.469736	-1.09008	0.0153095
RP1-184J9.2	9.1299	7.41754	8.01613	5.68874	4.7501	5.8956	0.469708	-1.09016	0.0111669
RFX7	5.34892	4.8529	4.72889	1.85315	2.42052	2.39997	0.469182	-1.09178	0.0439326
TRAM1	77.5734	64.9123	67.0057	39.0707	39.9107	37.7878	0.467523	-1.09689	0.0192372
APPL1	3.91673	3.40249	3.41283	1.58201	1.47106	1.43767	0.466133	-1.10119	0.00575565
NIPBL	5.54505	5.1589	6.07448	2.5055	2.06685	2.5189	0.465434	-1.10335	0.0352994
IRAK4	3.23304	2.72854	3.3949	1.26335	1.10405	1.41941	0.464531	-1.10615	0.0333541
TRNAU1AP	13.0671	10.9752	9.44008	8.41361	7.75116	8.85274	0.46411	-1.10746	0.00725371
MNS1	0.7155	0.391503	0.406907	0.304375	0	0.222199	0.463816	-1.10838	0.0318559
SLC35F3	2.5453	1.74869	1.35389	2.07406	1.412	1.91458	0.463695	-1.10875	0.0347869
SEC63	8.31648	8.55177	9.69878	3.58784	3.25816	4.05552	0.462992	-1.11094	0.0461059
SENP5	5.48735	4.83808	3.96846	3.27815	2.86634	3.36331	0.462788	-1.11158	0.0116626
USO1	10.7419	10.8976	10.49	4.78579	4.26937	4.15883	0.462175	-1.11349	0.00982039
IMPA2	19.0289	14.8149	14.9578	10.6979	10.4363	10.6723	0.462156	-1.11355	0.0150428
ARNTL	11.9785	8.59743	10.307	7.74696	6.88645	8.94054	0.461903	-1.11434	0.0403135
IPMK	4.79305	3.79598	3.3704	3.25521	2.7143	3.60956	0.460527	-1.11864	0.000702303
RP11-84A19.4	0.348613	0	0	0	0	0.385457	0.460256	-1.11949	0.0399367
NADK2	7.31622	7.95726	7.45652	2.2069	2.7849	2.59957	0.459277	-1.12256	0.0231218
PPFIBP1	11.3648	9.55687	10.6086	6.04517	5.87831	7.33623	0.459088	-1.12316	0.0219387
ZNF33B	1.23218	0.837097	0.90902	0.166448	0.276089	0.368681	0.458891	-1.12378	0.0227281
MAP4K3	4.39609	5.18208	5.05075	1.64681	1.33621	1.68054	0.457947	-1.12675	0.036199
LACTB	10.0376	8.05524	7.29131	7.69992	6.40286	9.01666	0.457038	-1.12962	0.00287857
QKI	2.48803	1.66336	1.69098	1.17301	1.14115	1.37249	0.456734	-1.13057	0.0083027
CALY	0.414268	0	0	0	0	0.219435	0.456526	-1.13123	0.0169457
FNDC3A	9.3571	7.54085	8.11267	5.73954	4.59387	5.51319	0.455941	-1.13308	0.0172722
CDCA7L	17.795	14.9422	13.0875	10.5538	9.70602	9.9296	0.455728	-1.13376	0.0242573
SAMD9	2.39055	1.89976	1.82236	0.619129	0.876905	0.857412	0.454884	-1.13643	0.0353193
PTAR1	2.85464	3.0156	2.67004	1.07783	0.930197	1.23295	0.454501	-1.13764	0.0115868
PRKACB	4.58303	4.63845	4.78165	1.4309	1.51374	1.54073	0.454418	-1.13791	0.000830087
DNAJC24	3.28621	2.85458	3.0782	1.50983	1.3536	1.99709	0.453261	-1.14159	0.0237554
SLC35F5	5.11902	4.1888	3.89008	3.14691	2.45891	2.97566	0.45214	-1.14516	0.00927065
GOPC	10.0461	10.4407	11.1628	4.20388	3.78625	4.22589	0.452086	-1.14533	0.0114361
ADCY7	3.33541	2.50979	2.69591	1.38127	1.35471	1.4845	0.451665	-1.14668	0.00730387
ADAM12	8.28824	6.98554	7.14157	3.69595	3.94454	4.16246	0.451346	-1.14769	0.00673331
PLS1	6.3009	4.7423	5.24389	3.80538	3.1006	3.87574	0.450531	-1.1503	0.0134687
RP11-456H18.2	2.75053	2.63924	2.23425	1.45401	1.02693	1.48859	0.450221	-1.1513	0.019454
NIN	3.64116	3.14593	3.00624	1.9102	1.32965	1.52736	0.449667	-1.15307	0.034073
CXADR	3.81347	3.95926	4.03761	0.94974	0.998514	0.85186	0.44933	-1.15415	0.000294894
NPFFR2	1.05741	1.11588	0.888267	0.100797	0	0.0885226	0.449085	-1.15494	0.00901377
FAM124A	0.66236	0	0	0.39418	0.397985	0.828216	0.448866	-1.15564	0.0442129
RPS6KA3	17.6	13.1647	14.2167	9.05731	8.86738	8.54621	0.448781	-1.15592	0.0372164
EXOC6	4.26388	3.97933	4.3831	2.09655	1.46156	1.94494	0.448431	-1.15704	0.0425786
IMPAD1	28.9535	22.9082	20.3474	18.3843	17.5455	19.2553	0.448126	-1.15802	0.0112738
CACNB3	10.5579	7.55797	7.42225	7.29229	7.09678	9.63326	0.447716	-1.15934	0.0128952
KIF16B	1.90679	1.46811	1.16848	0.943072	0.723193	0.964005	0.446419	-1.16353	0.00665675
VPS50	2.33673	1.47382	1.61124	0.825771	0.844294	0.78837	0.446384	-1.16364	0.0417909
COPS2	28.3564	25.5408	26.7224	13.9754	13.7096	15.1724	0.446367	-1.1637	0.00189093
SEC62	5.32331	5.72985	5.44239	2.23815	2.01525	2.59702	0.446306	-1.16389	0.0208087
KCNJ14	1.08254	0.400614	0.208683	0.716309	0.605832	0.910026	0.445735	-1.16574	0.0283641
LPL	21.7887	16.1833	18.6149	14.7743	12.6455	17.1516	0.44325	-1.17381	0.0299044
ANLN	36.4553	26.2918	25.3807	26.5199	22.1886	25.2671	0.442769	-1.17537	0.0206783
LIPT2	1.91988	1.37986	1.79144	0.268371	0.337948	0.234905	0.441387	-1.17989	0.0392184
RP11-865I6.2	0.363474	0	0	0	0	0.433488	0.441043	-1.18101	0.0462271
LONRF1	6.31969	4.18678	4.88277	4.76336	3.54944	5.15742	0.440459	-1.18292	0.0346649
NDC80	8.3858	6.83257	6.74537	3.67739	4.43792	4.96614	0.440327	-1.18335	0.044639
TBC1D3H	1.51798	1.48349	0.905983	0.736968	0.502426	0.910762	0.439453	-1.18622	0.0462898
EIF4EBP2	38.2009	37.3361	41.1942	16.0101	15.1958	15.1823	0.439384	-1.18645	0.00536749
OSBPL8	4.42061	4.62971	4.9067	1.48273	1.38179	1.70023	0.438948	-1.18788	0.0139863
DCUN1D1	3.3013	3.11469	3.16168	1.28806	1.18188	1.66029	0.438877	-1.18811	0.0132494
HERC1	5.44791	3.77287	3.96446	2.55055	2.61448	2.60542	0.438434	-1.18957	0.0319342
AC022201.5	0.814555	0.673307	0.333685	0	0	0	0.438213	-1.1903	0.0443182
INPP4A	2.91567	2.67857	1.80368	1.72241	1.35846	1.83585	0.437962	-1.19112	0.0417221
CRNKL1	6.21721	5.16312	6.04984	2.3388	2.61074	2.98557	0.436951	-1.19446	0.0336746
NARF	29.3557	18.0592	18.0674	22.0596	20.1521	22.8626	0.436552	-1.19577	0.0412558
HSD11B1L	3.23013	2.28398	1.92976	2.55547	2.19064	3.8926	0.436381	-1.19634	0.0242523
KAZN	1.69839	1.30934	1.08773	0.994399	0.485201	0.76804	0.436345	-1.19646	0.0450027
ARFGEF1	6.88437	6.46891	5.70748	2.69565	2.64282	2.31281	0.436247	-1.19678	0.0255588
SKOR1	0.622478	0.194544	0.0260027	0.262715	0.110644	0.318766	0.43618	-1.19701	0.0138606
HLTF	12.6756	13.2909	13.2694	3.57589	4.16143	3.14012	0.435721	-1.19852	0.0129097
IAH1	5.74049	3.31099	2.64331	6.25735	5.19445	8.55347	0.435559	-1.19906	0.00403172
HOGA1	3.63376	2.65241	2.85581	1.58609	1.44289	1.57011	0.435548	-1.1991	0.0101232
SP4	1.25028	0.846473	0.847997	0.553178	0.392302	0.928329	0.434887	-1.20129	0.0138088
GOLGA5	28.2825	21.0894	22.6169	14.8768	14.8195	15.1421	0.43445	-1.20274	0.0219952
CTC-559E9.8	0.778092	0.473406	0.293456	0	0	0	0.434436	-1.20278	0.0264406
VPS13A	2.51695	2.24412	2.33774	0.610435	0.597629	0.587189	0.433844	-1.20475	0.00105426
PXDN	46.0574	32.0626	34.254	25.795	25.7976	25.8175	0.433844	-1.20475	0.0449457
TWF1	40.1102	36.7286	41.2415	19.1217	17.3551	19.0856	0.433742	-1.20509	0.0112352
OPN3	40.2494	35.0893	38.0996	16.9159	17.1994	15.8381	0.432873	-1.20799	0.0135874
PRKDC	56.3729	61.8112	61.2217	21.3592	21.8235	21.3477	0.431744	-1.21175	0.000460806
PAPOLA	30.268	30.2114	30.4061	15.2358	13.6321	16.4911	0.43172	-1.21183	0.0116954
ZSCAN32	4.26941	5.20197	5.84755	1.07249	0.941617	1.1882	0.431144	-1.21376	0.049375
TMEM209	9.13117	8.01765	9.07844	3.14239	3.16655	2.70027	0.431081	-1.21397	0.021909
XPO4	3.08597	3.00023	2.71083	1.20347	1.07436	1.46547	0.431078	-1.21398	0.00602854
IWS1	25.7235	23.7231	21.3813	15.6521	12.453	14.3026	0.430324	-1.21651	0.0211413
MAPK1	21.423	20.5744	19.28	12.5666	9.81721	11.7845	0.42941	-1.21957	0.0224352
CTA-204B4.2	0.544534	0	0.142575	0	0	0.197765	0.42849	-1.22267	0.0461223
DOCK9	3.39891	3.39208	3.00779	1.37538	1.06313	1.31045	0.426539	-1.22925	0.00876674
KMT2E	3.96127	3.57892	3.63925	1.36787	1.18596	1.1659	0.426405	-1.2297	0.00554112
DHRS1	9.84124	7.71893	8.27676	6.61969	5.4836	8.36022	0.425998	-1.23108	0.0285596
CTD-3137H5.1	0.532941	0.209017	0	0	0	0.138143	0.425809	-1.23172	0.0250623
USP49	3.69847	2.97315	2.58903	2.02358	1.72966	2.29735	0.425773	-1.23184	0.000660244
RNF157	0.510544	0.153687	0.05843	0.052675	0.066554	0.462457	0.425157	-1.23393	0.0291893
ABHD12B	0.482436	0.108879	0.125403	0	0	0.396093	0.424241	-1.23704	0.03611
PM20D2	5.32884	4.52906	4.62494	2.66979	1.88502	2.04847	0.424181	-1.23725	0.0451481
CDC42BPB	37.971	33.6038	33.664	20.2586	17.2989	18.5394	0.423952	-1.23803	0.00912421
EIF2AK4	9.9017	8.16115	7.99575	5.35076	4.92344	5.93126	0.42395	-1.23803	5.78e-05
PPIP5K2	2.67815	3.116	2.90366	0.879215	0.55699	0.874577	0.423935	-1.23808	0.0407638
SOS1	3.60831	3.12926	3.58946	1.29655	0.967616	1.05898	0.423627	-1.23913	0.0223095
PDE4D	10.1972	6.82457	6.63767	5.67737	5.90202	6.21443	0.423327	-1.24015	0.0363958
HAT1	36.4562	36.7404	36.1246	16.4629	16.7754	19.9127	0.42332	-1.24018	0.0175908
TRAPPC11	2.51556	2.1679	2.15375	0.979146	0.779121	1.12644	0.423261	-1.24038	0.00171341
ARHGAP29	2.51181	1.50044	1.95786	0.879104	0.929868	1.13973	0.422803	-1.24194	0.0434406
JAK1	33.6443	26.2532	24.6939	18.105	17.1581	16.5027	0.422088	-1.24438	0.0352978
PPWD1	10.9456	8.53203	9.8319	4.28031	4.24389	3.7143	0.420403	-1.25015	0.0439982
GCFC2	2.98614	2.4234	2.43568	1.92603	1.23535	2.23343	0.419751	-1.25239	0.0325533
SLC25A4	4.1944	3.88558	3.0839	2.50016	2.16315	3.5106	0.418119	-1.25802	0.0398686
ASAP2	8.61862	7.22951	7.37618	3.05539	3.63718	3.46497	0.417699	-1.25946	0.0214682
FSCN2	0.984856	0.685627	0.755143	0.147897	0	0.189087	0.417476	-1.26024	0.00362354
BRWD3	3.22742	3.26569	3.30712	0.79922	0.888029	1.09856	0.417417	-1.26044	0.0114294
RP11-211G3.2	0.785872	0	0	0.627094	0.511331	1.09941	0.417032	-1.26177	0.0256478
EDEM3	4.92212	5.04488	5.47113	1.67579	1.26798	1.38332	0.416243	-1.2645	0.0213485
TGS1	7.64344	8.43375	8.7167	2.8772	2.61845	3.40156	0.416016	-1.26529	0.0355154
MTR	2.88731	2.26054	2.58923	0.922483	0.856901	1.03442	0.41563	-1.26663	0.00602576
DNAAF2	9.65142	9.96216	9.64979	3.14855	3.65395	3.81127	0.415557	-1.26688	0.0127864
PTPRJ	11.7874	10.1154	10.4679	5.93668	5.61169	7.1006	0.415041	-1.26867	0.00595216
KDM1B	6.77255	7.38525	6.31269	2.9055	2.44185	2.89509	0.413697	-1.27335	0.0176124
ZNF280D	2.18373	1.12374	1.30801	1.18534	0.805471	1.03221	0.410432	-1.28478	0.0425975
PPP2R1B	6.42349	5.07941	4.6139	3.83177	3.41006	4.70277	0.409812	-1.28697	0.00117326
UHMK1	19.8241	18.1814	17.8844	9.87098	8.2028	8.8297	0.409386	-1.28847	0.0108839
ERVV-2	0.534904	0	0	0	0	0.136033	0.409125	-1.28939	0.0284207
CCDC113	1.98323	1.22374	1.59922	0.657382	0.678105	1.15509	0.408689	-1.29092	0.0481207
BRCA1	4.59031	5.16695	4.37719	1.53144	1.53075	1.94017	0.408403	-1.29194	0.0255071
HDAC4	2.33867	2.06365	1.74601	0.673261	0.640338	0.743681	0.408019	-1.29329	0.0030094
C14orf142	19.1243	16.3642	14.5903	15.6269	11.3986	18.6199	0.407744	-1.29427	0.0383798
SFMBT2	3.96984	2.37284	2.56059	2.46201	1.83891	2.25302	0.407742	-1.29427	0.031966
AC005076.5	0.898738	0.357682	0.443709	0	0	0	0.407024	-1.29681	0.032981
LARP4	11.7688	11.1885	11.019	5.22782	4.66185	5.2715	0.405951	-1.30062	0.000990929
ERCC6	4.3307	3.69379	3.60842	2.07075	1.43738	1.68612	0.405763	-1.30129	0.02477
FAM78A	21.5697	26.8476	27.4723	7.17941	6.67504	7.26987	0.404928	-1.30426	0.0264136
DOCK7	5.29381	5.34062	4.79182	1.6425	1.67056	1.62325	0.404588	-1.30547	0.00270553
GTF2I	22.0819	18.6992	21.4075	10.0764	9.68587	11.3897	0.403687	-1.30869	0.0138253
RB1	4.78234	4.56534	4.42784	1.60528	1.55099	1.74163	0.40262	-1.31251	0.00010883
CEP55	22.4279	17.8227	17.9226	14.5288	10.4402	12.2519	0.40195	-1.31491	0.046436
MTAP	6.94333	5.58287	5.08267	3.22397	3.1748	3.51576	0.401389	-1.31693	0.00372786
PLAGL1	6.479	3.53728	3.51444	4.92583	3.997	4.93364	0.401342	-1.3171	0.033108
DHX40	31.1831	24.1931	24.8066	13.4321	15.4885	15.5976	0.400287	-1.32089	0.0307399
CLDN1	3.68487	3.66404	3.36248	1.40585	1.03602	1.3166	0.400052	-1.32174	0.00945863
SMAD5	9.40238	6.28226	6.49248	4.66144	4.87853	5.20572	0.40002	-1.32186	0.0277492
MITF	4.78289	3.76615	4.14067	2.70923	1.87799	2.77796	0.399749	-1.32283	0.0242542
NCOR2	64.4541	48.0167	48.0304	32.4491	33.5114	33.9936	0.399738	-1.32287	0.0203279
MAN1A2	3.35573	3.6128	2.52235	1.21159	0.994477	1.09713	0.399626	-1.32328	0.0451361
EFCAB7	2.79238	2.2094	1.69122	1.04756	1.07782	1.21395	0.399397	-1.32411	0.0189163
FCHO2	3.54163	3.23193	3.09914	1.50706	1.04148	1.37977	0.397941	-1.32938	0.0113268
ATP6V1C1	11.6995	8.4832	8.78043	5.535	5.76082	6.20809	0.397819	-1.32982	0.0146639
PDS5A	18.0892	16.8483	16.5883	6.7018	7.59071	7.9062	0.39664	-1.3341	0.00943942
RP11-734K21.2	0.500944	0	0	0	0	0.275097	0.396346	-1.33517	0.0169332
RTTN	3.70135	2.76759	2.56969	1.35006	1.46696	1.59595	0.39551	-1.33821	0.0107412
RP11-103G8.2	0.809421	0.358196	0.39646	0	0	0.165219	0.395089	-1.33975	0.00718007
KCTD3	17.8104	14.9776	15.7743	8.24156	8.15458	9.70461	0.394491	-1.34194	0.00484179
SMC4	13.4648	11.7229	11.8786	5.04188	5.36443	5.24126	0.394353	-1.34244	0.00428135
PRG4	8.68123	6.42539	7.90459	2.99301	3.34024	3.29561	0.393526	-1.34547	0.0389024
HMHA1	9.88088	7.92339	6.03496	7.29913	5.96041	8.48537	0.392884	-1.34782	0.0131243
DNMT3B	9.65051	7.86363	8.3464	3.56605	3.86813	3.90604	0.392646	-1.3487	0.00899292
BBX	6.73548	7.10638	6.52341	2.6035	2.615	3.66681	0.392485	-1.34929	0.043036
FPGT	1.50302	0.803554	0.925004	0.544276	0.364159	0.64168	0.39189	-1.35148	0.00660334
NCCRP1	1.54955	0.936388	0.370446	1.69233	1.0671	2.4158	0.391562	-1.35269	0.0395284
KIDINS220	4.62471	4.82903	4.22077	1.76748	1.39071	1.71637	0.391518	-1.35285	0.0110596
DDX59	12.452	9.45745	9.54009	8.11929	6.2329	8.38853	0.391371	-1.35339	0.00655783
ALG12	11.6659	12.2256	12.5596	4.32424	4.47687	5.90301	0.390819	-1.35543	0.0487561
RBMS2	6.82788	5.27658	4.44232	4.19158	3.35645	4.17666	0.390569	-1.35635	0.00793597
BPGM	11.2956	9.11365	7.41185	6.73397	6.7604	9.24534	0.389995	-1.35847	0.023063
DYNLT3	9.34913	6.18408	6.46873	4.46532	4.66239	4.92381	0.38966	-1.35971	0.0286911
LARS	28.3935	22.2666	21.0903	17.6745	14.522	17.557	0.38964	-1.35979	0.0036503
ANKRD13C	6.05122	5.60841	5.04848	2.01233	2.45458	2.86592	0.388249	-1.36494	0.0301445
DIS3	7.82771	6.77561	6.74092	2.37004	3.11558	3.16667	0.387594	-1.36738	0.0360555
CXCL16	15.9132	14.7678	12.8659	8.27575	7.60224	9.76499	0.387169	-1.36897	0.00653119
RHOBTB3	45.947	47.1689	45.7481	15.8723	16.8029	15.8747	0.387078	-1.3693	0.000576587
FOXN3	8.97676	6.23475	5.21696	4.72338	5.17937	5.73068	0.387035	-1.36946	0.0403189
CCDC71	10.5104	13.1572	12.1535	2.69674	2.85634	2.74005	0.3859	-1.3737	0.00673652
CCNG1	46.0373	31.2552	34.8794	26.9176	23.038	25.5629	0.38503	-1.37696	0.0302062
PTPN21	1.5889	1.31171	1.00304	0.330526	0.282829	0.417698	0.38455	-1.37876	0.0044843
TOP2A	64.4152	53.4505	52.69	32.1249	30.2245	33.4608	0.383291	-1.38349	0.000449218
PTGR2	4.57215	3.37778	3.61847	1.16979	1.6209	1.49801	0.383218	-1.38376	0.0446587
USP28	8.00309	6.16109	6.4041	2.86939	3.04316	2.83576	0.38223	-1.38749	0.0180206
HOXD8	1.04505	0.435169	0.241982	0.587333	0.247634	0.51409	0.381846	-1.38894	0.0237828
MBTD1	2.99509	3.30669	2.89454	0.320272	0.516359	0.40486	0.381493	-1.39027	0.0109328
ZMYM4	7.57798	5.98125	7.24722	2.19535	2.35854	2.08035	0.380461	-1.39418	0.0275106
VPS4B	5.69139	5.50397	4.7377	1.6347	1.96369	1.98855	0.380164	-1.39531	0.0158173
KIF13A	13.8479	11.4996	13.7576	5.7969	5.03793	5.68538	0.379494	-1.39785	0.0186149
DARS	18.1139	15.1491	15.1118	9.75221	9.00073	12.4618	0.379405	-1.39819	0.0102003
IQSEC1	9.9255	9.43981	9.30621	3.72966	3.71821	4.35805	0.379023	-1.39964	0.00249126
FAM208A	6.28796	6.45904	6.45488	1.84595	1.87905	2.15852	0.378577	-1.40134	0.00362497
LRBA	3.57253	2.90218	2.23568	1.23219	1.48046	1.71525	0.378088	-1.40321	0.0329137
MYO9A	1.95864	1.25579	1.47205	0.316789	0.404778	0.472517	0.377568	-1.40519	0.0181905
DIO2	83.8247	121.242	129.151	20.0784	20.5766	19.6509	0.376221	-1.41035	0.0277607
CASP1	12.1089	8.07598	8.19594	9.03766	6.03509	7.80027	0.375656	-1.41252	0.0479225
ZNF266	7.41757	7.15193	8.89071	1.562	2.06169	2.15959	0.375198	-1.41428	0.049993
BLM	3.40261	3.55888	2.86605	1.43922	0.963283	1.50998	0.374328	-1.41762	0.0283418
JMY	3.00584	1.91068	1.5479	1.26152	1.53089	2.01432	0.374201	-1.41811	0.0411385
TRIM24	8.80477	8.89398	7.67553	3.24083	3.23824	3.66868	0.374076	-1.4186	0.00571539
ZKSCAN1	3.75166	3.238	3.13728	1.0363	1.10942	1.25789	0.373315	-1.42153	0.00170821
ZBTB3	1.16447	0.892543	0.461334	0.512366	0.218907	0.607121	0.373238	-1.42183	0.0220801
MZT1	10.8203	7.77764	7.24205	5.79326	5.84542	7.36325	0.372737	-1.42377	0.00726353
MTM1	4.5249	3.28484	3.09671	1.90428	1.59947	1.63443	0.372457	-1.42486	0.0205445
RIOK3	5.66928	2.98496	3.21181	4.18733	3.34258	4.83692	0.372329	-1.42535	0.0119984
PRKCI	21.9705	18.1259	17.6094	9.99603	10.0932	11.4665	0.372226	-1.42575	0.00187626
FAM157C	0.903354	0.328442	0.266212	0.0876865	0	0.0270779	0.371426	-1.42885	0.0319449
BBS1	3.33712	3.3203	2.8267	1.66612	1.05897	1.97661	0.371154	-1.42991	0.0407902
ATP11B	4.85376	4.47492	4.38839	1.66295	1.48485	1.85688	0.369177	-1.43762	0.000571813
ICE2	3.80973	3.83084	3.14129	1.1813	0.974841	1.08165	0.369164	-1.43767	0.00933776
TAB3	10.4415	8.78307	7.69174	4.51015	4.5976	5.12323	0.368216	-1.44138	0.00535857
WI2-80269A6.1	0.470427	0	0	0	0	0.520145	0.368108	-1.4418	0.039612
ITGA7	1.48987	0.424353	0.627532	1.15235	0.613231	1.3614	0.368066	-1.44196	0.0316263
EXOC8	3.27131	2.85024	2.77849	1.47507	0.947257	1.5976	0.366343	-1.44873	0.0142709
SLC16A6	26.6318	41.2776	33.0376	6.05543	6.64047	5.81283	0.36602	-1.45001	0.0457642
FZD6	5.70076	6.5295	5.64007	1.48979	1.67103	2.03697	0.365753	-1.45106	0.0276249
TGFBR1	11.5384	9.18986	11.2519	4.72249	4.09748	4.80746	0.36522	-1.45316	0.0208006
STK38	20.1955	18.8492	15.9949	7.57866	8.22499	8.06253	0.364847	-1.45464	0.0147201
SOAT1	18.779	21.2843	21.9188	7.39699	5.95389	7.74563	0.36435	-1.4566	0.0435628
TTK	9.46711	7.03921	7.51831	4.00489	4.41144	5.68763	0.362295	-1.46476	0.027205
SLC44A1	20.2272	13.7835	14.0631	9.45411	9.25924	8.9983	0.362158	-1.46531	0.0360334
INPP5A	5.61933	3.82316	3.99617	2.26979	2.17999	2.34548	0.361958	-1.46611	0.0123203
USP34	7.06807	6.70113	6.63533	2.67118	2.04297	2.30212	0.361077	-1.46962	0.0103584
WAC	25.3504	22.5383	21.0751	8.19144	10.351	9.94935	0.357777	-1.48287	0.0324294
BROX	6.47938	6.12077	4.53801	2.8678	2.21816	2.33749	0.357364	-1.48454	0.0468028
MUC16	2.96152	2.23375	2.08362	0.739302	0.758164	0.756138	0.357245	-1.48502	0.00798393
LIMS1	5.25913	4.97086	4.84856	1.82927	1.90604	2.98936	0.355166	-1.49343	0.0471544
WWC2	3.13358	1.79516	1.96083	1.03798	1.13362	1.31685	0.354045	-1.498	0.0244046
TTC37	9.13523	8.43396	8.21396	3.7821	2.74487	3.00347	0.351549	-1.5082	0.024915
TMEM165	65.0454	47.8993	56.8911	39.6908	29.3622	40.8963	0.350594	-1.51213	0.0393856
STYX	6.30286	4.96481	5.24664	1.39251	1.91044	1.5697	0.350571	-1.51222	0.0356253
KTN1-AS1	2.4001	1.07619	1.56473	1.16378	0.884729	1.60161	0.349651	-1.51601	0.0394972
FAM25G	10.3543	6.12466	4.76609	8.20788	6.99994	9.60065	0.349345	-1.51728	0.0140416
LMAN1	36.93	24.1353	22.9812	21.0642	18.8135	20.1114	0.347014	-1.52694	0.0289137
MEGF9	18.564	16.0829	15.9823	6.448	6.73186	6.65831	0.346842	-1.52765	0.00264825
MTIF3	10.7314	7.82879	8.21029	4.61178	4.72688	5.8206	0.346277	-1.53	0.00821212
MOB1B	1.63696	1.38627	1.12729	0.391054	0.152447	0.39699	0.345281	-1.53416	0.00476601
AASDHPPT	13.3774	11.5828	12.541	4.63553	4.13882	4.09095	0.345183	-1.53457	0.00730324
RAD51AP1	17.1843	15.9299	20.4312	4.46972	5.08727	5.45055	0.344777	-1.53626	0.0381987
LRP1	48.7697	36.3273	36.2416	20.6724	20.4117	19.3825	0.343964	-1.53967	0.0236716
SPIRE1	3.24097	2.7675	1.85189	1.84411	1.35512	2.41077	0.343894	-1.53996	0.0238723
CTR9	22.7655	24.648	20.4604	7.72296	7.03726	6.48302	0.3435	-1.54162	0.021938
TOP2B	18.1801	15.6915	15.1547	5.5417	6.51318	5.89095	0.342904	-1.54412	0.0157912
SH3BP5L	12.7903	14.122	15.1907	3.55836	3.18218	3.42618	0.341653	-1.5494	0.00723324
RP11-739N20.2	0.769227	0.217387	0.327323	0.058705	0.033489	0.57868	0.340587	-1.5539	0.0412872
MDFIC	3.96455	2.7226	2.60649	1.92967	1.52485	2.28901	0.339381	-1.55902	7.77e-05
TBK1	13.3772	14.2057	12.2154	4.76309	4.86993	6.23499	0.338812	-1.56144	0.0236912
RP11-540O11.1	0.694858	0	0	0	0	0.138515	0.338588	-1.5624	0.0336737
NEDD1	6.69259	5.27536	5.72479	2.09003	2.42809	3.06488	0.338483	-1.56284	0.0239892
RP11-363E7.4	2.44209	2.13081	1.83243	0.392027	0.498074	0.690112	0.337765	-1.56591	0.00892241
RP4-647J21.1	1.06905	0.198337	0	0.673189	0.510445	1.06087	0.33386	-1.58269	0.0148926
CD46	112.677	117.455	111.744	35.2278	35.7512	33.9041	0.333639	-1.58364	0.000492781
ATAD2	14.0031	13.6468	14.103	3.90133	3.99269	3.95852	0.332288	-1.58949	9.39e-05
AGPS	17.2553	11.5391	10.6219	9.07957	7.94161	8.45469	0.332178	-1.58997	0.0256177
UFL1	2.9379	2.5761	3.08193	0.668939	0.415699	0.74596	0.331884	-1.59125	0.0174047
ASUN	27.4382	22.3446	19.8517	11.0409	11.2734	11.3393	0.331511	-1.59287	0.0108309
ZNF337	2.79653	2.10689	3.18702	0.0537527	0.198918	0.095049	0.330678	-1.5965	0.046979
DCAF6	18.0384	15.6545	16.7263	6.54566	5.9346	6.47161	0.329876	-1.6	0.00161007
RP4-753F5.1	0.534297	0	0	0	0	0.590766	0.329857	-1.60009	0.0394605
GLCCI1	19.0183	12.7974	13.5021	8.98808	8.43395	9.63699	0.32929	-1.60257	0.00883573
SH3BGRL	31.135	32.8849	32.0026	12.5078	9.19926	10.5553	0.328235	-1.6072	0.0318311
ZRANB2	21.1513	18.8417	17.1077	7.89402	8.58575	10.1033	0.327529	-1.61031	0.00999235
USP8	7.12652	7.94249	6.27041	2.11772	2.19346	2.83897	0.32733	-1.61118	0.0287816
FBXO42	4.50099	3.10045	3.85822	2.06513	1.46713	2.56057	0.326976	-1.61274	0.0294622
ZUFSP	8.38855	7.23496	5.39298	2.67347	3.2208	3.16149	0.324861	-1.6221	0.0447906
ACBD4	5.03259	3.04422	3.65183	2.3705	1.99854	3.13442	0.322644	-1.63199	0.0156975
MICU2	14.4567	13.8535	10.1623	6.41181	5.50047	6.34875	0.320337	-1.64234	0.0242185
EVA1B	0.849421	0.385856	0.256964	0	0	0.363475	0.319974	-1.64397	0.0102015
NCKAP1	29.2504	28.5784	28.006	8.96693	9.83123	10.805	0.319514	-1.64605	0.00567039
CTD-2020K17.3	2.94779	1.59336	2.19938	1.05386	0.768686	1.24712	0.318996	-1.64839	0.0270279
RP1-86C11.7	0.723167	0.123719	0	0	0	0.237122	0.318584	-1.65026	0.0133918
PLSCR4	4.21783	2.49019	2.18369	1.31677	1.56012	1.49087	0.31734	-1.6559	0.0491369
PNPLA3	2.49509	1.92074	1.97575	1.01806	0.629973	1.61538	0.316694	-1.65884	0.0283378
FBN2	55.2453	47.9374	51.1306	22.5523	19.3627	22.7181	0.316309	-1.66059	0.00321818
P3H3	0.916784	0.071189	0.036256	0.364742	0.233185	0.683477	0.315396	-1.66477	0.00974733
RAD17	6.95362	6.12672	5.8149	2.82985	1.9818	2.62901	0.313163	-1.67501	0.00894879
ZNF136	1.82396	1.03886	0.816266	0.42484	0.538571	0.973626	0.312995	-1.67579	0.0210206
RP11-554E23.4	0.942248	0.510114	0.173879	0	0	0.179691	0.310651	-1.68663	0.0192552
LRRC40	5.91	5.77779	5.69163	1.71831	1.70219	2.73457	0.310075	-1.68931	0.0340404
PDCD4	15.0977	10.2989	12.3587	7.7189	5.73069	7.86241	0.309803	-1.69058	0.0233395
OSGIN2	16.3538	14.5986	12.0408	7.14493	5.74598	6.4685	0.309556	-1.69173	0.0135018
RP13-131K19.2	1.13596	0.298529	0.492165	0	0	0.120378	0.306908	-1.70412	0.0306199
C5orf24	12.2232	10.067	11.0555	4.07854	3.36973	3.50713	0.306632	-1.70542	0.0103198
VIM-AS1	0.903999	0.191548	0.105035	0	0	0.112829	0.306039	-1.70821	0.023744
WASF3	2.35339	1.27804	1.28361	0.539001	0.509222	0.629338	0.305456	-1.71097	0.0123996
APBB2	6.34362	5.03384	4.80456	1.80804	1.68184	1.66069	0.30393	-1.71819	0.00585926
RP5-994D16.3	0.686697	0	0	0	0	0.378371	0.302238	-1.72624	0.0169951
TTF1	6.45182	5.60781	6.105	2.35658	1.74203	2.77028	0.300955	-1.73238	0.0153906
HTRA3	16.4437	12.62	11.1259	7.7942	7.41219	10.2255	0.300353	-1.73527	0.00327131
GJA5	4.57878	2.64188	3.17209	1.10141	1.23816	1.18568	0.299759	-1.73813	0.0374211
ANKZF1	16.9317	8.06675	8.45685	15.239	9.6953	14.3921	0.299408	-1.73981	0.0423697
RCOR2	3.32088	1.30901	1.33621	1.81012	1.84884	3.11613	0.298341	-1.74496	0.0299998
SLC30A9	17.3896	18.7574	17.7336	6.08812	5.26822	7.5501	0.297854	-1.74732	0.0262544
MFAP3	11.3319	8.79745	8.33532	4.5096	4.20407	5.38838	0.296284	-1.75495	0.000277927
CTD-2527I21.9	0.912117	0.293796	0	0.335657	0	0.222468	0.295955	-1.75655	0.0374309
TCTN1	8.1732	6.37028	5.33394	3.41742	3.34848	4.71971	0.295777	-1.75742	0.00643087
TM4SF5	1.43264	0.208664	0.272931	1.04487	0.42168	0.953416	0.294683	-1.76277	0.0418613
ADGRA3	10.7213	10.308	9.65147	3.6881	2.98337	3.78836	0.29468	-1.76278	0.00311633
ZC3H10	2.62952	3.43581	3.46081	0.217362	0	0.324319	0.293214	-1.76998	0.0494281
FNBP1	11.0423	7.10997	7.98716	5.87128	3.77922	4.84667	0.29313	-1.77039	0.0415695
PDZD2	3.14976	1.81745	1.75974	0.788224	0.966152	1.28195	0.291738	-1.77725	0.018951
SNRPD1	55.7346	39.9991	35.8276	35.2986	32.1899	56.9714	0.291715	-1.77737	0.0283452
CASP9	19.3179	11.9621	11.4987	9.29546	8.4272	9.41717	0.291465	-1.7786	0.0163707
TUBE1	4.00161	2.78668	2.79577	1.93854	1.23975	2.44564	0.287782	-1.79695	0.00727804
ADPRM	3.32073	2.26266	2.26402	1.83828	1.06718	2.60194	0.286687	-1.80245	0.021255
FARP1	3.90902	2.45247	1.99332	1.47285	1.35432	1.83056	0.28598	-1.80601	0.00540703
RP1-228H13.5	0.920275	0.311731	0	0.315989	0.131306	0.64629	0.285682	-1.80752	0.00702605
GNMT	1.00618	0.461267	0	0.31606	0.120456	0.485859	0.283411	-1.81903	0.0286295
RP11-158I23.1	2.46376	2.35216	2.29347	0.223879	0.295411	0.842367	0.281334	-1.82964	0.0465445
TRUB2	47.9648	32.1037	26.5156	22.8983	22.2939	24.4004	0.281178	-1.83044	0.0229724
GPR137B	8.19562	5.44317	4.61397	2.55258	2.7688	2.46873	0.280851	-1.83212	0.0444633
LGR4	15.4264	16.5226	18.4999	2.94104	3.18204	3.33111	0.278936	-1.84199	0.00515863
FAM206A	11.5853	10.996	9.26659	4.25038	3.54416	4.83883	0.27621	-1.85616	0.00483991
PLEKHA5	4.52511	2.77949	2.56338	2.6468	1.62387	2.94704	0.275776	-1.85843	0.00340046
REEP3	24.1653	16.5939	17.7561	7.8698	8.40107	8.65915	0.273731	-1.86917	0.0144183
TNFAIP8	12.004	7.85332	8.07965	6.20502	4.20651	5.59699	0.273582	-1.86995	0.0164674
KIF5B	18.7534	19.5498	21.7499	4.95005	4.31694	5.47237	0.272754	-1.87433	0.0142905
C11orf57	7.90247	6.0083	8.09443	1.53678	1.53747	1.58848	0.271958	-1.87855	0.0206124
RP11-554D15.3	1.00382	0.0713041	0.0743018	0	0	0.0792796	0.271876	-1.87898	0.0453572
ADD3	8.99003	9.01656	7.29255	1.9846	2.4398	2.84908	0.270055	-1.88867	0.021371
RP4-714D9.2	2.91015	2.27815	1.73214	0.589966	0.390468	0.47428	0.268535	-1.89682	0.0111426
WDR89	4.67882	3.3414	3.73762	0.806548	0.976428	1.16938	0.266535	-1.9076	0.00994146
VAMP7	24.3928	18.6949	14.0382	8.16101	9.07113	8.41521	0.266131	-1.90979	0.048086
SLC35A1	13.7905	10.259	11.3294	5.33791	4.17346	5.69536	0.262816	-1.92788	0.00482477
CCR1	5.21887	6.22111	5.52357	0.672973	0.3629	0.253094	0.262144	-1.93157	0.0253184
MED23	6.14175	5.15443	4.50681	2.01385	1.68645	2.61975	0.260675	-1.93968	0.00188311
EVI5	2.62722	1.08389	1.1854	0.783283	0.667991	1.04159	0.259357	-1.94699	0.0130213
STK26	23.0901	18.54	16.9597	8.78621	7.28258	8.48289	0.259265	-1.9475	0.00217111
PLOD2	68.205	36.6781	43.952	26.6549	26.7818	28.2035	0.25456	-1.97392	0.0462851
UPK1A	1.1083	0.139461	0.155012	0.180797	0	0.246993	0.251877	-1.98921	0.0156656
RP3-416H24.1	10.0494	9.01054	7.91613	1.45056	2.47616	2.24225	0.250268	-1.99845	0.0474935
RBM12B	3.0378	2.63907	1.83551	0.51313	0.350339	0.486148	0.249575	-2.00246	0.0104699
CD82	7.82278	3.81844	3.22834	5.3746	5.05398	11.0571	0.238158	-2.07001	0.0328796
CKAP2L	4.91653	3.33232	3.03845	1.76025	1.41292	2.58686	0.237328	-2.07505	0.00130274
AC002456.2	0.955081	0.086655	0	0	0	0.362831	0.234081	-2.09492	0.0129869
2020-09-10	23.9559	14.1166	12.0969	12.561	10.2455	13.733	0.231803	-2.10903	0.00464537
AC005954.4	1.44371	0.295434	0.280651	0	0	0	0.230073	-2.11984	0.0491645
ARMT1	12.6178	9.90438	9.72043	5.80795	3.12468	4.81269	0.228906	-2.12718	0.0363498
RP1-43E13.2	1.42882	0.747577	0.292653	0.645607	0	0.446278	0.228264	-2.13122	0.0389195
ZNF146	15.9965	10.537	9.10884	6.34291	5.95568	7.95559	0.228244	-2.13135	0.00240877
RP11-15I11.2	0.78469	0	0	0	0	0.811993	0.227838	-2.13392	0.034819
AC005387.3	0.884195	0.501554	0	0.516099	0	1.17134	0.225391	-2.1495	0.0449069
LA16c-380H5.5	1.04743	0.301395	0	0	0	0.357446	0.223087	-2.16432	0.0152234
FAM175B	7.02341	6.24125	5.1729	2.18356	1.51262	2.52177	0.221217	-2.17647	0.00493637
PROS1	12.8223	6.92413	5.47399	5.57516	5.15202	6.04611	0.220016	-2.18432	0.0256757
SLC23A1	2.29966	1.04863	1.56597	0.534721	0.265039	1.18138	0.218425	-2.19479	0.0313807
RP4-761J14.10	0.93441	0.290385	0	0	0	0.688777	0.215557	-2.21386	0.0239258
PPP1R12B	2.54106	2.38933	1.86475	0.628389	0.212723	1.26468	0.214565	-2.22052	0.0401561
PCDHB2	1.58407	0.857857	0.458667	0.463757	0.117345	0.896135	0.210351	-2.24913	0.00352026
RP11-705C15.5	2.32394	1.91833	0.778034	0.51995	0.207732	0.548493	0.209824	-2.25275	0.0408247
RP11-571M6.17	3.34687	2.31052	1.46752	0.891475	0.559421	1.17438	0.196487	-2.34749	0.00480846
ZGLP1	2.06117	1.10391	1.39029	0.181159	0	0.67917	0.192277	-2.37874	0.0151702
TMEM187	8.40389	7.07049	7.03849	3.60152	1.72782	4.36142	0.19135	-2.38571	0.0469924
COL12A1	99.0152	116.166	101.243	19.8578	17.7921	20.1586	0.188411	-2.40805	0.00487432
RP11-815I9.4	1.5049	0	0	0.420726	0.532463	1.6298	0.185917	-2.42727	0.0450152
DENND4A	3.79665	2.10983	2.03393	0.99592	0.536312	1.1768	0.18483	-2.43573	0.00073418
TRNP1	5.01441	0.891478	0.970496	3.70169	2.86722	5.62528	0.176353	-2.50346	0.0298757
CRY1	8.48788	6.31281	6.12543	1.80361	1.51065	2.38003	0.17586	-2.5075	0.000256025
RP11-182J1.12	1.30963	0.4122	0	0	0	0.456819	0.172527	-2.5351	0.01714
CCAT1	4.14653	2.94646	2.90498	1.69837	0.503573	2.07075	0.172423	-2.53597	0.0368872
NEK7	32.1062	17.098	18.972	7.52977	7.42099	6.51812	0.171244	-2.54588	0.0425694
CTD-2003C8.2	2.26677	0.695709	0.153016	0.854621	0.865062	2.3375	0.167146	-2.58082	0.0287595
ATG4C	5.50028	3.1566	3.05558	1.6479	0.993438	2.10163	0.165721	-2.59317	0.000487054
FAAH2	1.67936	0.094822	0	0.742818	0.482125	1.77502	0.163758	-2.61036	0.00630298
RP11-473I1.5	4.45446	2.09479	1.2082	1.61516	0.890602	1.27425	0.161898	-2.62685	0.0364151
CDH5	4.50761	1.9984	2.07729	0.371767	0.538911	0.589958	0.156181	-2.67871	0.0244593
ING4	14.6104	9.84265	6.60903	3.80227	2.99438	3.35225	0.144647	-2.78939	0.0227927
GPR160	2.98245	0.986611	0.859571	0.630972	0.646826	1.99849	0.143908	-2.79678	0.0163626
ELANE	1.54806	0	0	0.278827	0	0.469378	0.142941	-2.8065	0.0143382
GJD3	1.38956	0	0	0	0	1.06217	0.120613	-3.05154	0.0227753
TMEM177	11.494	7.20942	9.60235	2.21862	0.749173	2.20795	0.0933798	-3.42074	0.027076
RDX	26.375	19.2838	18.4411	6.33886	3.01776	6.76496	0.0855879	-3.54645	0.0123596
LINC00963	5.89829	1.89232	1.44301	1.85731	0.834808	3.52358	0.0696192	-3.84437	9.78e-05
CEBPD	55.5267	59.269	60.5854	0	0	0	0.0190169	-5.71658	5.63e-06
RN7SL1	28.0101	0	0	13.0242	0	121.259	0.000171362	-12.5107	0.0187437
